# Supplementary material
Source: publisher site journal article supplement (https://www.dovepress.com/article/330170)
Supplement: Supplementary file 1 [file get_supplementary_file.php]

1 **Supplemental Information**

2

3 **Development of aging-related emphysematous and lymphoma-**  
4 **like lesions is enhanced by the lack of secretoglobin 3A2 in**  
5 **mouse lungs**

6

7 Reiko Kurotani, Akira Kurumazuka, Satoshi Sakahara, Kei Takakura, Yutaro Yokoyama, Lei Xu, Jieqiong Dai,  
8 Maxwell P. Lee, Nobue Kumaki, Hiroyuki Abe, Shioko Kimura.

9

10 **Supplemental Materials and Methods**

11 **Supplemental Figure S1 Legend**

12 **Supplemental Figure S2 Legend**

13 **Supplemental Figure S3 Legend**

14 **Supplemental Figure S4 Legend**

15 **Supplemental Figure S5 Legend**

16 **Supplemental Figure S6 Legend**

17 **Supplemental Figure S7 Legend**

18 **Supplemental Figure S8 Legend**

19 **Supplemental References**

20 **Supplemental Figure S1**

21 **Supplemental Figure S2**

22 **Supplemental Figure S3**

23 **Supplemental Figure S4**

24 **Supplemental Figure S5**

25 **Supplemental Figure S6**

26 **Supplemental Figure S7**

27 **Supplemental Figure S8**

28 **Supplemental Table S1**

29 **Supplemental Table S2**

30 **Supplemental Table S3**

31

## 32 **Supplemental Materials and Methods**

33

### 34 **Evaluation of elastic fiber content**

35 To determine the amount of elastic fibers in mouse lung tissue, quantification of elastic fibers was performed  
36 by referring to the quantitative evaluation method of angiogenesis and tumors<sup>1</sup>. In the images of Victoria blue  
37 (VB)-stained alveoli, areas of 60 × 60 μm<sup>2</sup> (360 pixels × 360 pixels) without adjacent bronchi and blood vessels  
38 were cropped, and the quantification of elastic fiber content was performed using ImageJ software (NIH,  
39 Bethesda, MD, USA). The numbers of cropped alveoli images analyzed ranged 99–181 using 3–5 lung tissue

40 sections from three mice for each age. The target 24-bit RGB image was separated into 8-bit grayscale images  
41 for each of the red, green, and blue channels using the split channels command, and the red channel image was  
42 subtracted from the blue channel image using image calculator. The threshold was set at  $\geq 31$ , and the elastic  
43 fiber signal for each alveolus was quantified by obtaining the gray intensity within the threshold range.

44

## 45 Cell culture

46 Raw264 [a mouse monocyte/macrophage (M $\phi$ ) cell line] cells and MH-S (a mouse alveolar M $\phi$  cell line)  
47 cells were obtained from the American Type Culture Collection (Manassas, VA, USA) and cultured in Roswell  
48 Park Memorial Institute medium (RPMI)-1640 medium supplemented with 10% FBS and 1 % penicillin-  
49 streptomycin mixed solution (Nacalai Tesque, Kyoto, Japan) at 37°C in 5% CO<sub>2</sub> and 95% air. RAW264 and MH-  
50 S cells were plated at  $5.0 \times 10^5$  cells/mL in a 35-mm-diameter dish and cultured for 16 hours in normal  
51 maintenance medium with and without SCGB3A2 (1  $\mu$ g/mL).

52

## 53 Fluorescent immunostaining

54 Fluorescent immunostaining was performed to evaluate surfactant protein (SP)-A, SP-B, SP-C, and SP-D  
55 expression in the lungs of aging mice. In brief, after deparaffinization, sections were washed with pure water,  
56 and the sections were reacted with 5% milk (Morinaga Milk, Tokyo, Japan) in PBS (pH 7.4) for 1 h at room  
57 temperature to block nonspecific proteins. Primary antibodies against SP-A (H-148, sc-13977, Santa Cruz  
58 Biotechnology, Dallas, TX, USA), SP-B (WRAB-SPB, Seven Hills Bioreagents, Cincinnati, OH, USA), SP-C (FL-  
59 197, sc-13979, Santa Cruz Biotechnology), and SP-D (H-120, sc-13980, Santa Cruz Biotechnology) diluted  
60 3200-fold with 5% milk in PBS were reacted with slides at 4°C for 16–18 h. After the primary antibody reaction,  
61 biotin-labeled secondary antibody, supplemented with normal goat serum, was added to the tissues and reacted  
62 for 30 min at room temperature followed by reaction with FITC-labeled avidin and biotin complex for 30 min at  
63 room temperature in the dark. (Vectastain Elite ABC Kit, Vector Laboratories). After washing the tissues, cell  
64 nuclei were stained with 0.1  $\mu$ g/mL of 4',6-Diamidino-2-phenylindole, dihydrochloride (DAPI) (Thermo Fisher  
65 Scientific) in the dark at room temperature. Tissues were washed and sealed with CC/Mount (Diagnostic

66 Biosystems, Pleasanton, CA, USA). The localization of SPs was observed under an FV1200 confocal laser  
67 microscope (Olympus).

## 68 69 **Supplemental Figure S1. Evaluation of alveolar elastic fiber content**

70 The amount of elastic fibers in the pulmonary alveoli of wild-type (WT) and *Secretoglobin (Scgb) 3a2-*  
71 knockout (KO) mice from day 0 to 2 years (y) is presented as a bar graph and a scatter plot. Black bars and  
72 circles: WT; white bars and circles: *Scgb3a2*-KO. The number of alveoli images analyzed (shown in parenthesis)  
73 was as follows: day 0, WT (108) and KO (99); day 1, WT (129) and KO (142); day 5, WT (111) and KO (99); day  
74 7, WT (116) and KO (122); day 15, WT (111) and KO (135); 8 weeks of age (8 w), WT (113) and KO (181); 1  
75 year of age (1 y), WT (116) and KO (137); 1.5 y, WT (115) and KO (103); 2 y, WT (122) and KO (141). Data are  
76 presented as the mean  $\pm$  standard deviation (SD). Significant differences between WT and *Scgb3a2*-KO mice at  
77 each age were analyzed using Student's *t*-test ( $*p < 0.05$ ,  $**p < 0.01$ ). Differences among ages within the WT or  
78 KO group were analyzed by one-way analysis of variance (ANOVA), followed by the Tukey–Kramer post hoc  
79 test. Different letters indicate significant differences between WT mice of different ages (a–e) and KO mice of  
80 different ages (A–F).  $p < 0.05$  for day 0 vs. day 5 in WT, day 1 vs. day 5 in WT, and 8 w vs. 1 y in KO, and  $p <$   
81  $0.01$  for the others.

## 82 83 **Supplemental Figure S2. Expression of SCGB3A2 during lung** 84 **development/maturation**

85 A. Immunohistochemistry for Secretoglobin (SCGB) 3A2 (i-viii). Representative immunohistochemistry results.  
86 i: day 0; ii: day 1; iii: day 5; iv: day 7; v: day 15; vi: 8 weeks (8 w), vii: 1-year-old wild-type (WT) mouse lung  
87 as a reference; viii: 8 w *Secretoglobin (Scgb) 3a2*-knockout (KO) mouse lung as a negative control with no  
88 SCGB3A2 staining, indicating the specificity of the SCGB3A2 antibody used. Arrows: secretory-like images,  
89 Brown: immunopositive signal for SCGB3A2, blue: nuclei. Scale bars: 50  $\mu\text{m}$ .

90 B. Quantitative reverse transcriptase-polymerase chain reaction (qRT-PCR) for SCGB3A2 during development.  
91 Four mice (two males and two females) from day 0 to day 15 and eight mice (four males and four females)

92 from 8 w were analyzed. qRT-PCR results (each sample analyzed in triplicate) for SCGB3A2 mRNA  
93 expression in WT mouse lungs from day 0 to day 15 and 8 w presented as a bar graph and scatter plot. Data  
94 are presented as the mean  $\pm$  standard deviation (SD). Differences between ages were examined by one-  
95 way analysis of variance (ANOVA), followed by the Tukey–Kramer post hoc test ( $*p < 0.05$ ).

96

### 97 **Supplemental Figure S3. A rare pathology and the effect of** 98 **SCGB3A2 on macrophage polarity**

99 A. Representative hematoxylin and eosin (HE)-stained images revealing a high level of macrophage  
100 accumulation observed in the lungs of aged wild-type (WT) and *Secretoglobin (Scgb) 3a2*-knockout (KO)  
101 mice and their Ym1/2 immunohistochemical staining images (i-iv). i: HE-stained image of the lung of 1.5-  
102 year-old (1.5 y) WT mouse, ii: HE-stained image of the lung of 2-year-old (2 y) *Scgb3a2*-knockout (KO)  
103 mouse, iii: immunohistochemistry for Ym1/2 (marker for macrophage pneumonia) in 1.5 y WT mouse, iv: HE-  
104 stained image of the lung of 2 y *Scgb3a2*-KO mouse. White arrowheads: macrophages. Brown indicated by  
105 black arrowheads: Ym1/2 immunopositivity. Blue in iii and iv: nuclei. Scale bars: 20  $\mu$ m.

106 B. Expression of macrophage polarity marker genes in macrophage cell lines in the presence and absence of  
107 SCGB3A2 by quantitative reverse transcriptase-polymerase chain reaction (qRT-PCR) (i-iv). i: expression of  
108 type I macrophage marker *Tumor necrosis factor-alpha (Tnf- $\alpha$ )* mRNA in Raw 264, ii: expression of type II  
109 macrophage marker *Interleukin-10 (Il-10)* mRNA in Raw 264, iii: expression of *Tnf- $\alpha$*  mRNA in MH-S cells,  
110 and iv: expression of *Il-10* mRNA in MH-S in the presence (SCGB) or absence (Cont.) of SCGB3A2. N = 3–  
111 5, each performed in triplicate. Data are presented as the mean  $\pm$  standard deviation (SD). Differences  
112 between Cont. and SCGB were analyzed by Student's *t*-test ( $*p < 0.05$ ).

113

### 114 **Supplemental Figure S4. Expression of SPs in the mouse lungs** 115 **during aging process**

116 Representative fluorescent immunostaining for Surfactant proteins (SPs) of lung tissues from wild-type (WT)  
117 and *Secretoglobin (Scgb) 3a2*-knockout (KO) mice from 8 weeks (8 w) to 2 years (2 y) old (Ai-x – Di-x). A: SP-  
118 A; B: SP-B; C: SP-C; D: SP-D; i: 8 w, WT, ii: 8 w, *Scgb3a2*- KO, iii: 0.5 y, WT, iv: 0.5 y, *Scgb3a2*- KO, v: 1 y, WT,  
119 vi: 1 y, *Scgb3a2*- KO, vii: 1.5 y, WT, viii: 1.5 y, *Scgb3a2*- KO, ix: 2 y, WT, 2 y, *Scgb3a2*- KO, green: each SP;  
120 blue: nuclei stained with 4',6-Diamidino-2-phenylindole, dihydrochloride (DAPI). Scale bar: 10  $\mu$ m.

121  
122 **Supplemental Figure S5. *Serpina1a* expression in lung tissues of WT**  
123 **and *Scgb3a2* KO mice.**

124 *Serpina1a* expression in wild-type (WT) and *Secretoglobin (Scgb) 3a2*-knockout (KO) mouse lungs at 8  
125 weeks of age is presented as a bar graph and scatter plot. *Serpina1a* mRNA was detected in WT mouse lungs  
126 at 8 weeks, but it was barely detectable in KO mouse. Five male WT mice and four male KO mice were used.  
127 The experiments were performed in triplicate per sample. mRNA expression in WT and KO mouse lungs was  
128 too low to be accurately analyzed at 0.5 to 2 years of age, and the data are not presented. For WT and KO  
129 mouse lungs from 0.5 to 2 years, the same samples used in Fig.5A were used.

130  
131 **Supplemental Figure S6. Gene expression in the lungs of 3-month-**  
132 **old WT and *Scgb3a2*-KO mice.**

133 Significantly different genes identified by RNA sequencing (2-fold changes,  $p < 0.01$ ) are presented in a  
134 heatmap. KO lungs: KOP3, KOP4, and KOP5; WT lungs: WTP2, WTP3, WTP4, and WTP.

135  
136 **Supplemental Figure S7. Changes of BALF and serum SCGB3A2**  
137 **concentrations during aging**

138 Enzyme-linked immunosorbent assay (ELISA) was performed to measure Secretoglobin (SCGB) 3A2  
139 concentrations in bronchoalveolar lavage fluid (BALF) (A) and serum (B) from wild-type (WT) mice from 8 weeks  
140 (8 w ) to 2 years (2 y) of age using a modification of a previously described method<sup>2</sup>, and the results are presented

141 in a bar graph and scatter plot. In this experiment, mouse uteroglobin-related protein 1/ SCGB3A2  
142 (mUGRP1/SCGB3A2) antibody was used. SCGB3A2 levels in BALF significantly increased at 0.5 years of age  
143 and remained constant until 2 years of age. SCGB3A2 levels in serum appeared to increase at 1 and 1.5 years  
144 of age, but no statistical significance was observed. A: N = 5–8. The age, sex, and number of mice analyzed  
145 were as follows: 8 w: 4 males (m), 4 females (f); 0.5 y: 3 m, 3 f; 1 y: 5 f; 1.5 y: 5 f; 2 y: 6 m, 1 f. B: N = 4–8. The  
146 age, sex, and number of mice analyzed were as follows: 8 w: 4 m, 4 f; 0.5 y: 3 m, 4 f; 1 y: 4 f; 1.5 y: 4 f; 2 y: 5 m,  
147 1 f. Data are presented as the mean  $\pm$  standard deviation (SD). Significant differences between 8 weeks old and  
148 other ages were analyzed using Student's *t*-test ( $*p < 0.05$ , 8 w vs. 0.5, 1, 1.5, and 2 y).

149

## 150 **Supplemental Figure S8. Schematic relationship among aging,** 151 **major lung SPs and physiological changes in the lungs of SCGB3A2-** 152 **deficient mice**

153 In wild-type (WT) mouse lungs, the expression of Secretoglobin (SCGB) 3A2, SCGB1A1, Surfactant protein  
154 (SP)-A, B, C, and D remained constant during aging. In *Secretoglobin (Scgb) 3a2*-knockout (KO) mouse lungs,  
155 the expression of SPs in young adults (8 weeks old) was comparable to that of WT mice at both mRNA and  
156 protein levels (high). With aging, SP mRNA expression decreased significantly in KO as compared with WT lungs.  
157 The results of RNA sequencing, which indicated that KO mice have an inherently hyperactive immune system at  
158 3 months old, suggest that the aging-dependent activation of the immune system may occur in KO mouse lungs.  
159 Furthermore, SCGB3A2 changes the polarity of macrophages from inflammatory type I to anti-inflammatory type  
160 II, suggesting that in SCGB3A2-deficient lungs, macrophages are likely to enhance inflammatory action in  
161 SCGB3A2-deficient lungs. SCGB3A2 deficiency is also associated with a possible reduction of Alpha-1-  
162 Antitrypsin (A1AT) expression, all together resulting in the increased risks of lung inflammation and emphysema.

163

## 164 **Supplemental References**

- 165 1 Wild R, Ramakrishnan S, Sedgewick J *et al.* Quantitative assessment of angiogenesis and tumor vessel  
166 architecture by computer-assisted digital image analysis: effects of VEGF-toxin conjugate on tumor  
167 microvessel density. *Microvasc Res.* 2000;59:368-376.
- 168 2 Chiba Y, Kurotani R, Kusakabe T *et al.* Uteroglobin-related protein 1 expression suppresses allergic  
169 airway inflammation in mice. *Am J Respir Crit Care Med.* 2006;173:958-964.



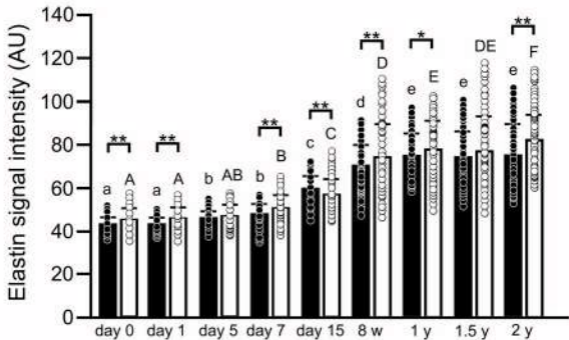

Supplemental Figure S1

**A**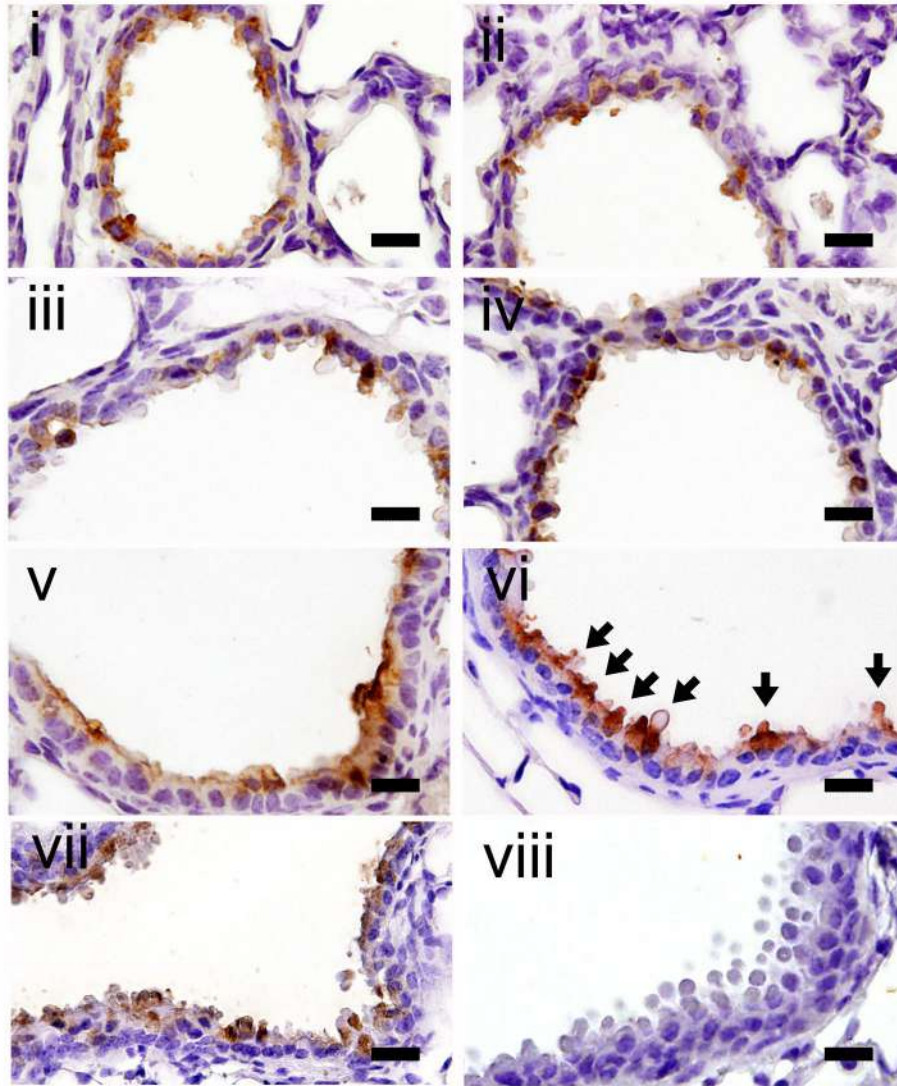**B**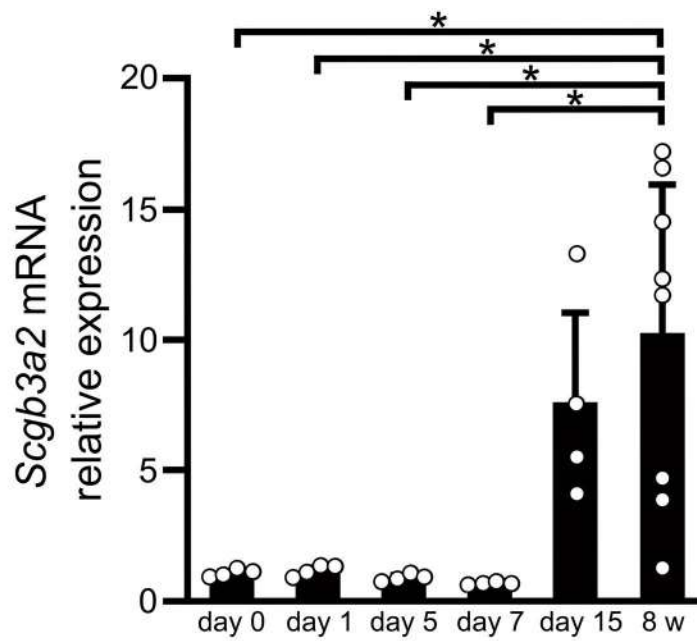

Supplemental Figure S2

**A**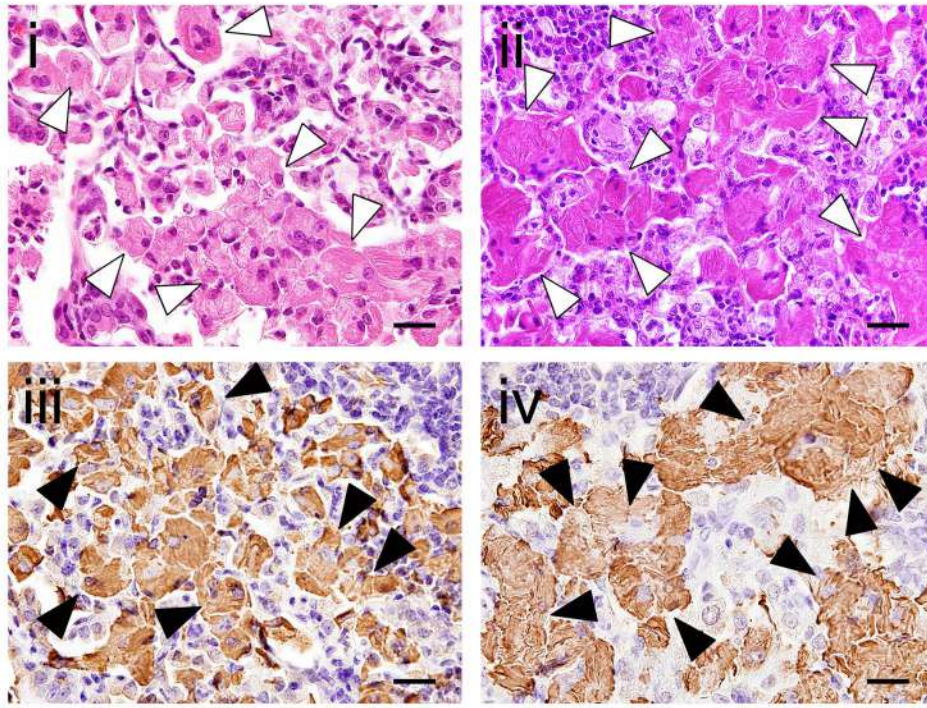**B**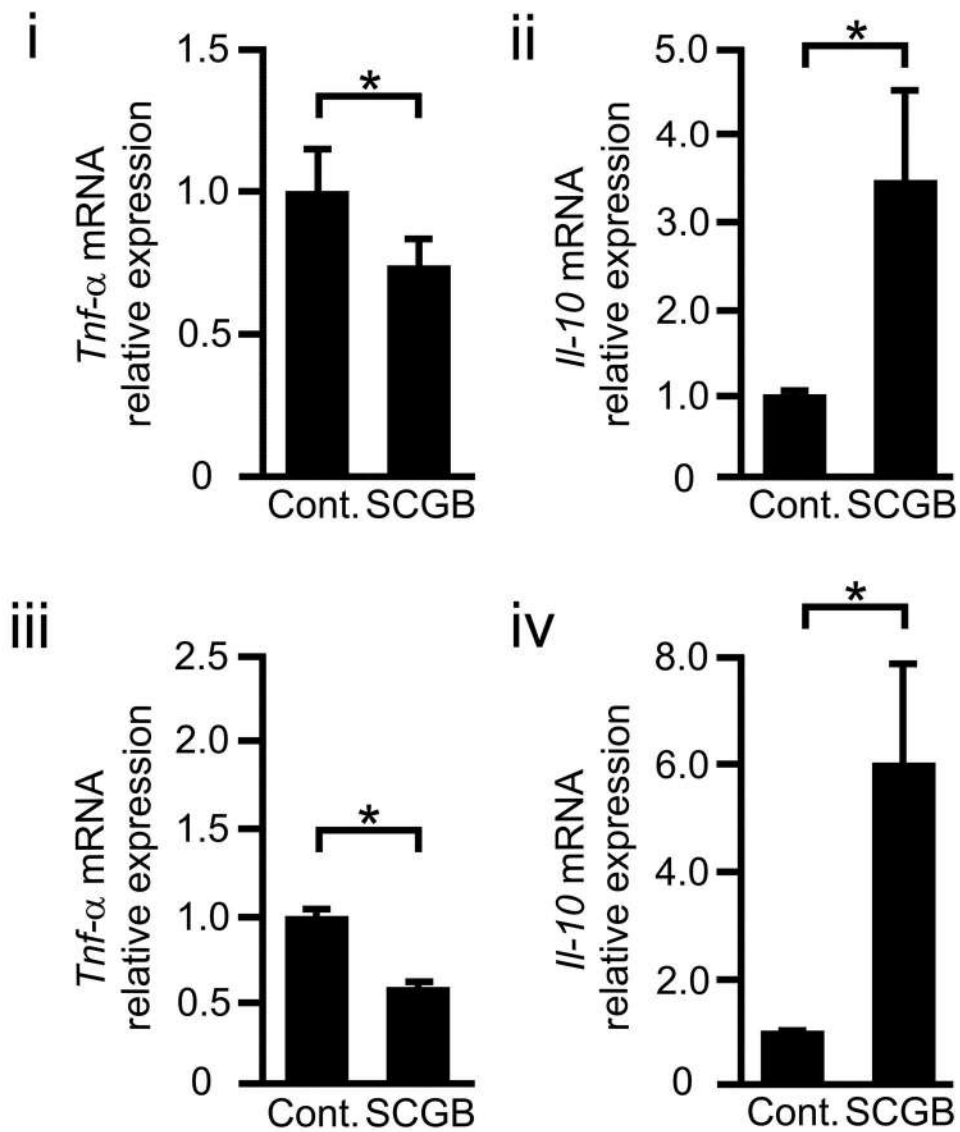**Supplemental Figure S3**

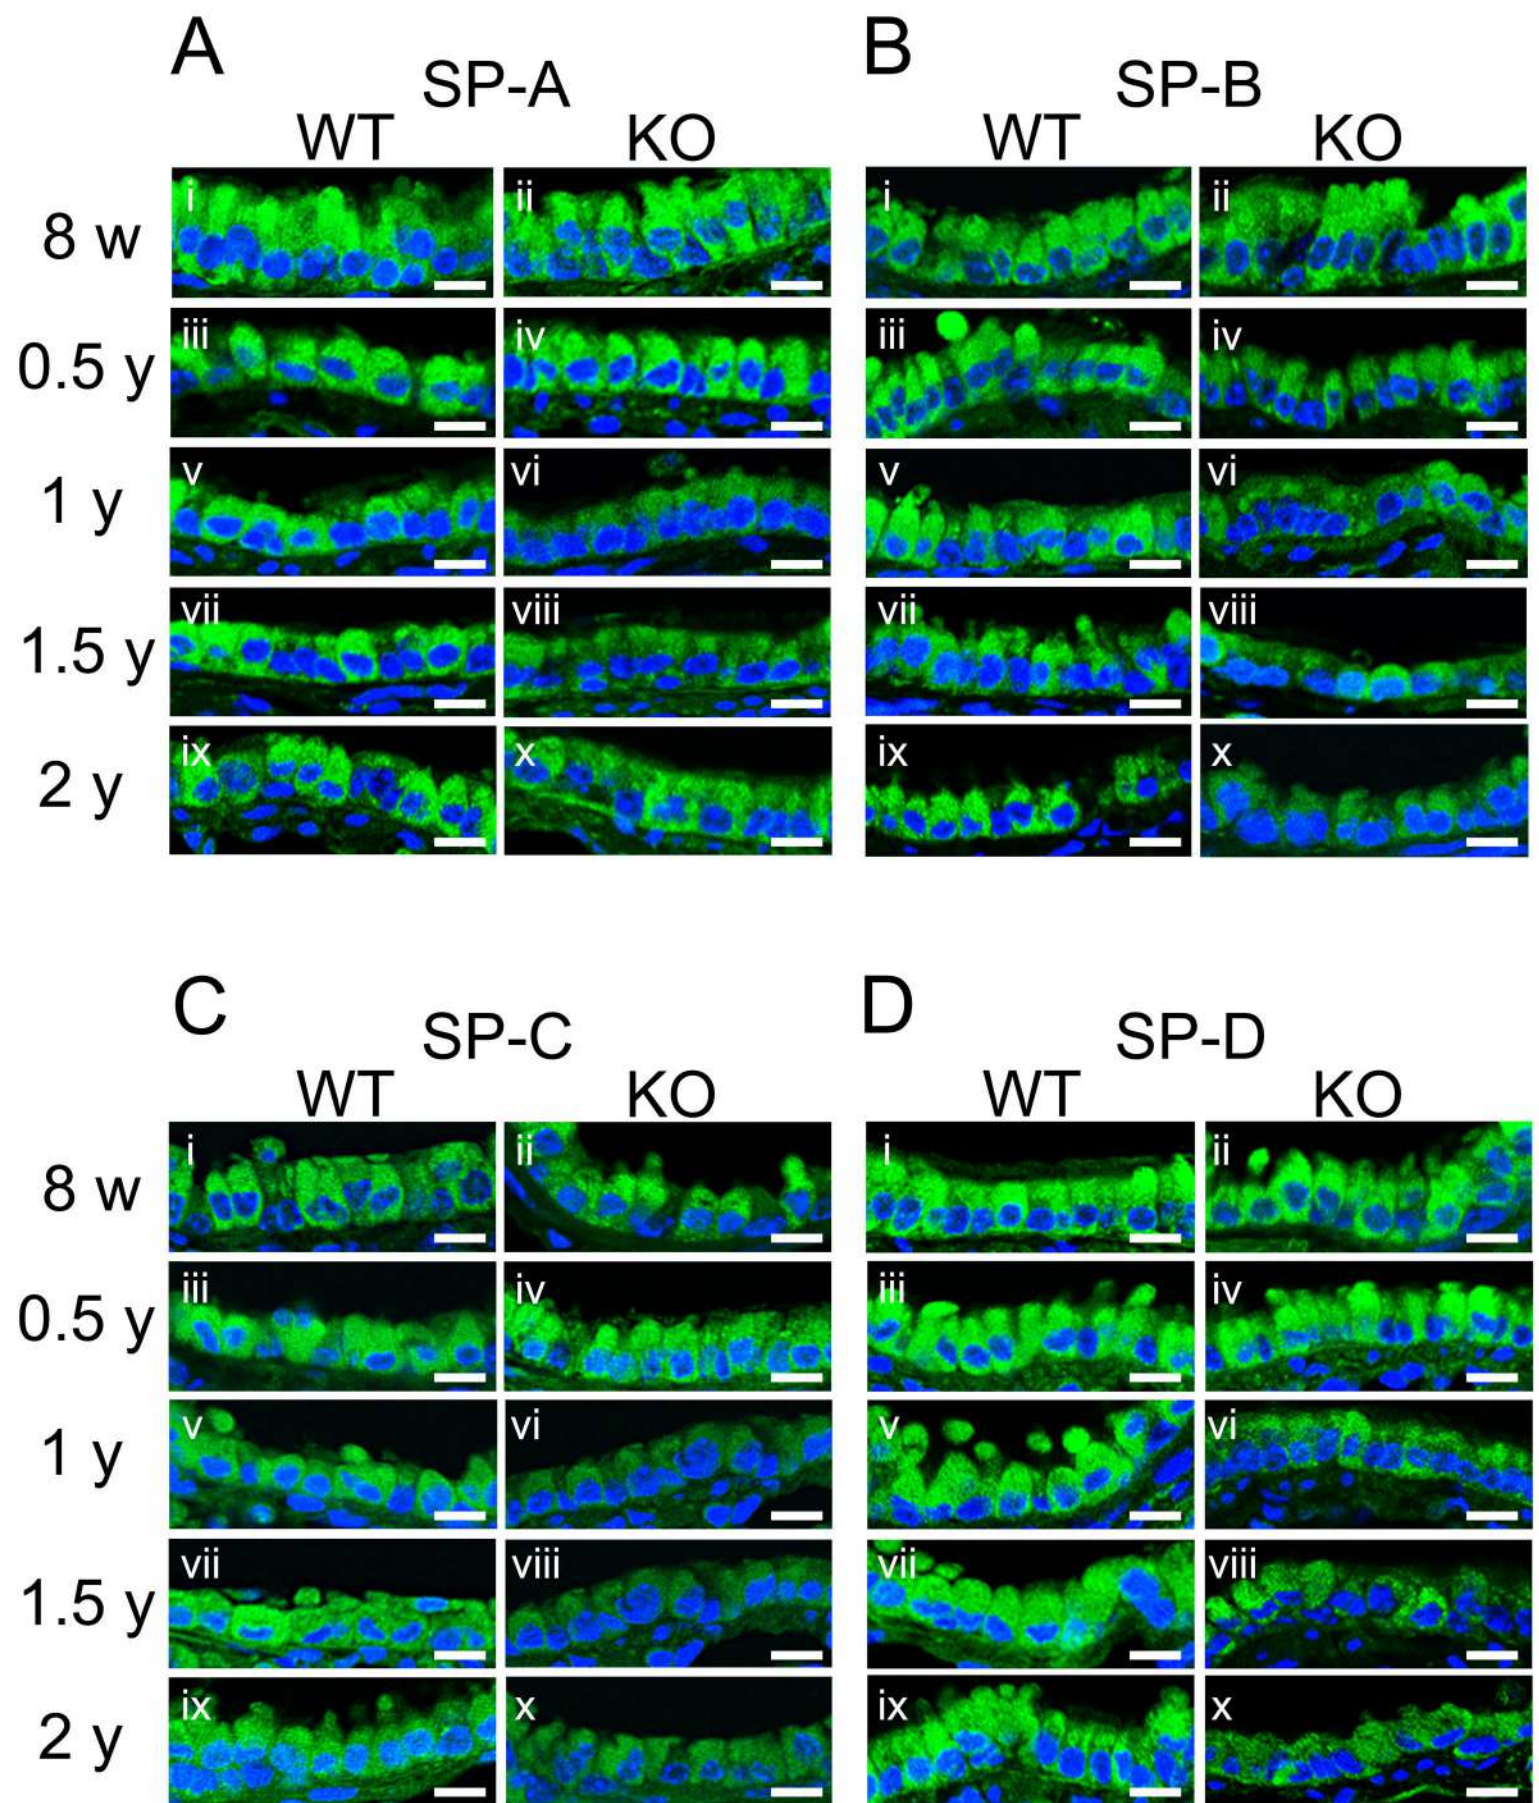

Supplemental Figure S4

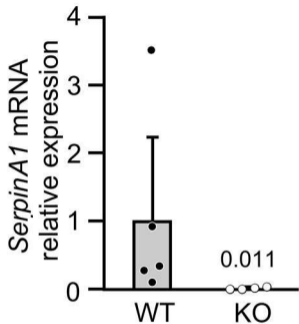

Supplemental Figure S5

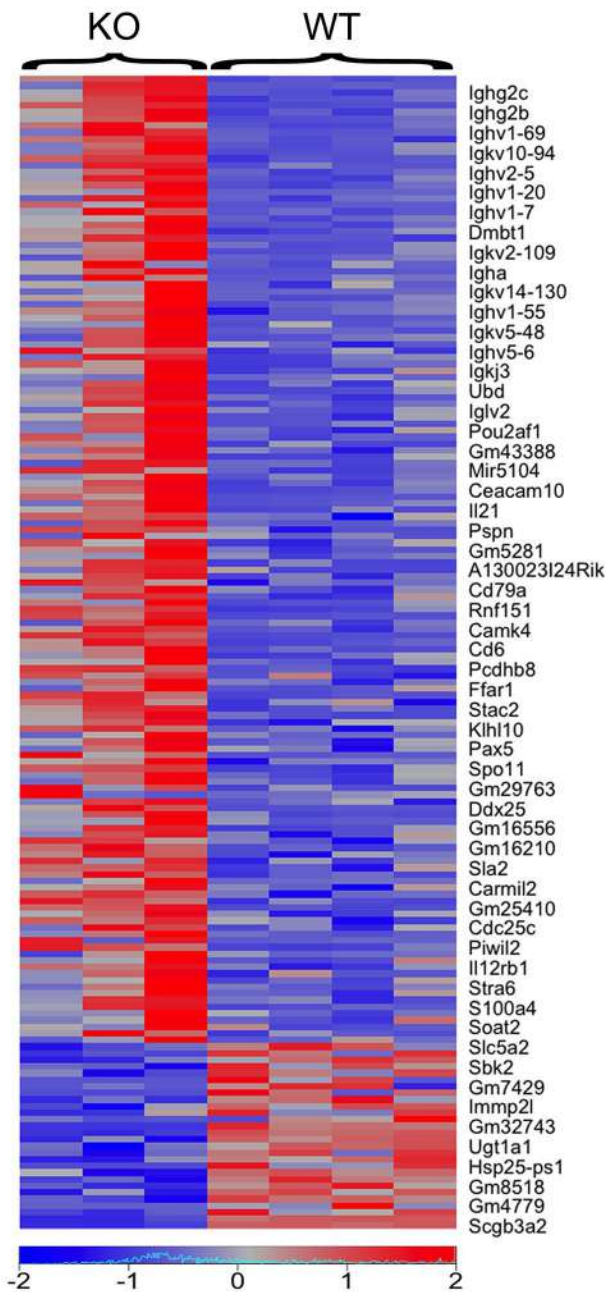

Supplemental Figure S6

**A**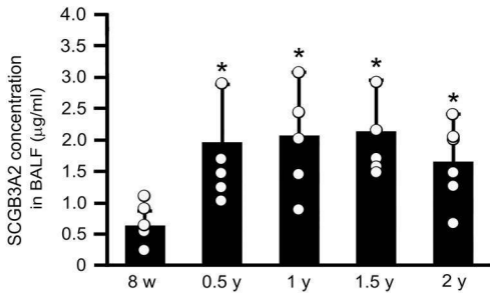**B**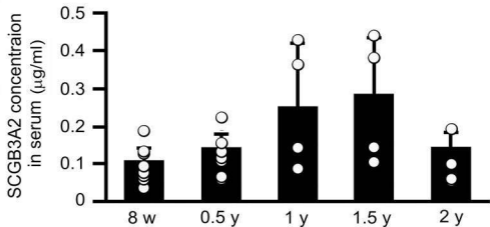

Supplemental Figure S7

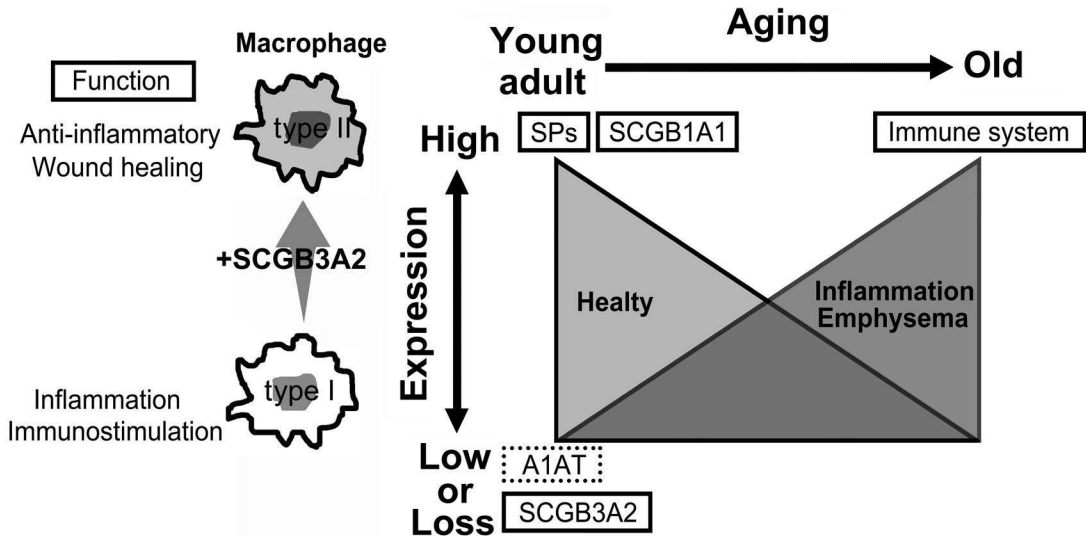

Supplemental Figure S8



## Supplemental Table S1. Primers used for qRT-PCR

| target gene      | sequence (5' → 3')                                              |
|------------------|-----------------------------------------------------------------|
| <i>Scgb1a1</i>   | FWD: GCTCAGCTTCTTCGGACATC<br>REV: CTCTTGTGGGAGGGTATCCA          |
| <i>Scgb3a2</i>   | FWD: GACTGCATTCCAAAGTCCCG<br>REV: GAGAAGGGCAGTGGCAGAATAACC      |
| <i>Sftpa</i>     | FWD: TAAGAAGCCAGAGAACCAGGTAGG<br>REV: CTCAGTGATGTAAAGTGGACGAAGG |
| <i>Sftpb</i>     | FWD: CTGCTTCTACCCTCTGCTG<br>REV: TCCTCACACTCTTGGCACAG           |
| <i>Sftpc</i>     | FWD: TAGCCCCGAGTGAGCGAGCA<br>REV: GTGGGTGTGGAGGGCTTGGC          |
| <i>Sftpd</i>     | FWD: TTTGAGGATGCCCAGGAGATGTGC<br>REV: AGGAAAGCAGCCTTGTGTGG      |
| <i>Tnf-alpha</i> | FWD: ATGAGCACAGAAAGCATGATC<br>REV: CAGAGCAATGACTCCAAAGTA        |
| <i>Il-10</i>     | FWD: ACAGCCGGGAAGACAATAAC<br>REV: TCATTTCCGATAAGGCTTGG          |
| <i>Serpina1a</i> | FWD: TCCTTCCAACACCTCCTCCA<br>REV: CCTTGGGTTCCCTTCTCCAC          |
| <i>β-actin</i>   | FWD: TGGCACCACACCTTCTACAATGAG<br>REV: GGGTCATCTTTTCACGGTTGG     |

qRT-PCR: quantitative reverse transcription-polymerase chain reaction, *Scgb1a1*: Secretoglobin family 1A member 1, *Scgb3a2*: Secretoglobin family 3A member 2, *Sftpa*: Surfactant protein A, *Sftpb*: Surfactant protein B, *Sftpc*: Surfactant protein C, *Sftpd*: Surfactant protein D, *Tnf-alpha*: Tumor necrosis factor-alpha, *Il-10*: Interleukin-10, *Serpina1a*: serine (or cysteine) peptidase inhibitor, clade A (Mus musculus), as known as Alpha-1- Antitrypsin, FWD: Forward primer, REV: Reverse primer

**Supplemental Table S2.** Pathology of lungs of aging mice. Number of positives/number of animals (%)

| age                         | 8 w       |           | 0.5 y     |          | 1 y                   |                       | 1.5 y                 |                        | 2 y       |                       |
|-----------------------------|-----------|-----------|-----------|----------|-----------------------|-----------------------|-----------------------|------------------------|-----------|-----------------------|
|                             | WT        | KO        | WT        | KO       | WT                    | KO                    | WT                    | KO                     | WT        | KO                    |
| normal                      | 3/3 (100) | 6/6 (100) | 8/8 (100) | 4/5 (80) | 4/9 (44)              | 0 (0)                 | 1/5 (20)              | 0(0)                   | 5/10 (50) | 0 (0)                 |
| lymphocyte infiltration     | 0 (0)     | 0 (0)     | 0 (0)     | 1/5 (20) | 0 (0)                 | 5/5 (100)             | 0 (0)                 | 1/10 (10)              | 0 (0)     | 0 (0)                 |
| lymphocyte aggregates       | 0 (0)     | 0 (0)     | 0 (0)     | 0 (0)    | 5/9 (56) <sup>a</sup> | 0 (0)                 | 4/5 (80)              | 9/10 (90)              | 5/10 (50) | 8/9 (89)              |
| Lymphoma                    | 0 (0)     | 0 (0)     | 0 (0)     | 0 (0)    | 0 (0)                 | 0 (0)                 | 0 (0)                 | 0 (0)                  | 0 (0)     | 1/9 (11) <sup>b</sup> |
| Alveolar hyperplasia, focal | 0 (0)     | 0 (0)     | 0 (0)     | 0 (0)    | 0 (0)                 | 1/5 (20) <sup>c</sup> | 0 (0)                 | 1/10 (10) <sup>d</sup> | 0 (0)     | 0 (0)                 |
| Macrophage pneumonia        | 0 (0)     | 0 (0)     | 0 (0)     | 0 (0)    | 0 (0)                 | 0 (0)                 | 1/5 (20) <sup>e</sup> | 0 (0)                  | 0 (0)     | 1/9 (11) <sup>f</sup> |
| Other lesions               | 0 (0)     | 0 (0)     | 0 (0)     | 0 (0)    | 0 (0)                 | 0 (0)                 | 0 (0)                 | 2/10 (20) <sup>g</sup> | 0 (0)     | 2/9 (22) <sup>g</sup> |

WT: wild-type, KO: *Secretoglobin (Scgb) 3a2*-knockout, 8 w: 8 weeks old, 0.5 y to 2 y: 0.5 years old to 2 years old

a: Focus of alveolar inflammation

b: Lymphoma found in 1 of 9 mice with lymphocyte aggregation (lymphoma suspected in 2 mice)

c: Tumor or hyperplasia observed in one of the mononuclear infiltrated mice

d: Lymph node plasma cell hyperplasia with lymphoid aggregates

e: Detected in 1 of 5 mice with lymphocyte aggregation

f: Detected in 1 of 9 mice with lymphocyte aggregation

g: Small focus or filtration of alveolar macrophages with lymphoid infiltration or aggregation

**Supplemental Table S3.** Pathology of spleen of aging mice. Number of positives/number of animals (%)

| age                          | 8 w       |           | 0.5 y    |          | 1 y       |           | 1.5 y     |                       | 2 y         |                       |
|------------------------------|-----------|-----------|----------|----------|-----------|-----------|-----------|-----------------------|-------------|-----------------------|
|                              | WT        | KO        | WT       | KO       | WT        | KO        | WT        | KO                    | WT          | KO                    |
| normal                       | 3/3 (100) | 3/3 (100) | 6/8 (75) | 4/5(80)  | 0/9 (0)   | 0/5 (0)   | 0/5 (0)   | 0/5 (0)               | 0/10 (0)    | 0/8 (0)               |
| white pulp fusion            | 0 (0)     | 0 (0)     | 2/8 (25) | 2/5 (40) | 9/9 (100) | 5/5 (100) | 5/5 (100) | 5/5 (100)             | 10/10 (100) | 8/8 (100)             |
| Extramedullary hematopoiesis | 0 (0)     | 0 (0)     | 2/8 (25) | 4/5 (80) | 1/5 (20)  | 5/5 (100) | 2/5 (40)  | 5/5(100)              | 10/10 (100) | 8/8 (100)             |
| fibrosis                     | 0 (0)     | 0 (0)     | 0 (0)    | 3/5 (60) | 9/9 (100) | 5/5 (100) | 5/5 (100) | 5/5 (100)             | 10/10 (100) | 7/8 (88)              |
| metaplasia in white pulp     | 0 (0)     | 0 (0)     | 0 (0)    | 0 (0)    | 0 (0)     | 5/5 (100) | 0(0)      | 5/5 (100)             | 9/10 (90)   | 8/8 (100)             |
| Other                        | 0 (0)     | 0 (0)     | 0 (0)    | 0 (0)    | 0 (0)     | 0 (0)     | 0(0)      | 1/5 (20) <sup>a</sup> | 0(0)        | 2/8 (25) <sup>b</sup> |
| erythropoiesis               | 0 (0)     | 0 (0)     | 0 (0)    | 0 (0)    | 0 (0)     | 0 (0)     | 0(0)      | 1/5 (20)              | 10/10 (100) | 8/8 (100)             |

The white pulp fusions began to be observed in both WT and KO spleens at 0.5 years of age. The fusion of WT spleens were found in a small portion of the tissue while that of KO spleens was larger and occupied wider areas of the spleen than WT. Extramedullary hematopoiesis (erythroid element, megakaryocytes and myeloid cells) in the splenic red pulp was observed from 0.5 years of age in both WT and KO, however the prevalence was much higher in KO than WT mice. They became more pronounced at 2 years of age. Fibrosis was observed from 1 year of age in WT and from 0.5 years of age in KO. a: Increase of plasma cells, b: Increase in plasma cells and Russell bodies. WT: wild-type, KO: *Secretoglobin (Scgb) 3a2*-knockout, 8 w: 8 weeks old, 0.5 y to 2y: 0.5 years old to 2 years old
